# Supplementary material
Source: publisher figshare collection journal article supplement (https://tandf.figshare.com/articles/dataset/_/9816449)
Supplement: Supplementary file 1 [file 5]

Archive with 3 entries (3 files):
- uasa_a_1660171_sm7533.zip
- uasa_a_1660171_sm5653.docx
- uasa_a_1660171_sm9745.pdf
